# Supplementary material
Source: MDPI journal article supplement (https://www.mdpi.com/2073-4352/11/6/679)
Supplement: s1 [file s1]

Table S1: Anisotropic displacement parameters in  $10^4 \text{ pm}^2$  of  $\text{InAlF}_6(\text{NH}_3)_2$ .

| Atom | $U_{11}$  | $U_{22}$  | $U_{33}$  | $U_{23}$   | $U_{13}$   | $U_{12}$   |
|------|-----------|-----------|-----------|------------|------------|------------|
| In   | 0.0066(1) | 0.0064(1) | 0.0062(1) | 0          | 0.00122(6) | 0          |
| Al   | 0.0040(3) | 0.0030(4) | 0.0034(3) | 0          | 0.0004(3)  | 0          |
| F(1) | 0.0102(4) | 0.0098(4) | 0.0104(4) | −0.0026(4) | 0.0015(3)  | −0.0007(3) |
| F(2) | 0.0100(6) | 0.0093(6) | 0.0104(6) | 0          | 0.0001(5)  | 0          |
| N(1) | 0.0080(8) | 0.0102(8) | 0.0103(8) | 0          | 0.0015(6)  | 0          |

Table S2. Anisotropic displacement parameters in  $10^4 \text{ pm}^2$  of  $[\text{In}(\text{NH}_3)_6][\text{AlF}_6]$ .

| Atom | $U_{11}$  | $U_{22}$  | $U_{33}$  | $U_{23}$    | $U_{13}$    | $U_{12}$    |
|------|-----------|-----------|-----------|-------------|-------------|-------------|
| In   | 0.0184(2) | 0.0184(2) | 0.0184(2) | −0.00004(6) | −0.00004(6) | −0.00004(6) |
| Al   | 0.0147(3) | 0.0147(3) | 0.0147(3) | 0.0003(2)   | 0.0003(2)   | −0.0003(2)  |
| F    | 0.0329(7) | 0.0278(6) | 0.0296(7) | −0.0033(5)  | 0.0009(5)   | 0.0087(5)   |
| N    | 0.0232(9) | 0.036(1)  | 0.023(1)  | 0.0020(7)   | 0.0012(7)   | −0.0029(7)  |

Table S3. Fractional atomic coordinates and isotropic displacement parameters in  $10^4 \text{ pm}^2$  of  $[\text{In}_2\text{F}(\text{NH}_3)_{10}]_2[\text{SiF}_6]_5 \cdot 2 \text{ NH}_3$ .

| Atom  | Site | $x/a$      | $y/b$         | $z/c$      | $U_{\text{eq}}$ |
|-------|------|------------|---------------|------------|-----------------|
| In(1) | $4c$ | 0.48037(4) | $\frac{1}{4}$ | 0.38183(5) | 0.0147(2)       |
| In(2) | $4c$ | 0.29487(4) | $\frac{1}{4}$ | 0.63848(5) | 0.0149(2)       |
| In(3) | $8d$ | 0.38072(3) | 0.05146(2)    | 0.01898(4) | 0.0167(2)       |
| Si(1) | $8d$ | 0.0694(2)  | 0.11121(8)    | 0.8058(2)  | 0.0240(4)       |
| Si(2) | $4c$ | 0.3768(2)  | $\frac{1}{4}$ | 0.0161(2)  | 0.0174(5)       |
| Si(3) | $8d$ | 0.2181(2)  | 0.11339(7)    | 0.3267(2)  | 0.0177(4)       |
| N(1)  | $4c$ | 0.3476(6)  | $\frac{1}{4}$ | 0.2964(7)  | 0.018(2)        |
| H(1A) | $8d$ | 0.320(5)   | 0.275(3)      | 0.298(6)   | 0.022           |
| H(1B) | $4c$ | 0.343(8)   | $\frac{1}{4}$ | 0.237(9)   | 0.022           |
| N(2)  | $4c$ | 0.1000(6)  | $\frac{1}{4}$ | 0.0101(7)  | 0.023(2)        |
| H(2A) | $8d$ | 0.095(5)   | 0.277(3)      | −0.039(6)  | 0.027           |
| H(2B) | $4c$ | 0.146(9)   | $\frac{1}{4}$ | 0.038(9)   | 0.027           |
| N(3)  | $4c$ | 0.0698(6)  | $\frac{1}{4}$ | 0.2576(7)  | 0.023(2)        |
| H(3A) | $4c$ | 0.029(8)   | $\frac{1}{4}$ | 0.321(9)   | 0.028           |
| H(3B) | $8d$ | 0.108(5)   | 0.278(3)      | 0.267(6)   | 0.028           |
| N(4)  | $8d$ | 0.4813(4)  | 0.3389(2)     | 0.3958(5)  | 0.020(2)        |
| H(4A) | $8d$ | 0.520(6)   | 0.351(3)      | 0.359(6)   | 0.023           |
| H(4B) | $8d$ | 0.489(6)   | 0.353(3)      | 0.451(6)   | 0.023           |
| H(4C) | $8d$ | 0.426(6)   | 0.357(3)      | 0.381(6)   | 0.023           |
| N(5)  | $4c$ | 0.1701(6)  | $\frac{1}{4}$ | 0.5356(7)  | 0.022(2)        |

|        |    |           |               |               |          |
|--------|----|-----------|---------------|---------------|----------|
| H(5A)  | 4c | 0.106(8)  | $\frac{1}{4}$ | 0.562(9)      | 0.027    |
| H(5B)  | 8d | 0.163(6)  | 0.275(3)      | 0.495(6)      | 0.027    |
| N(6)   | 4c | 0.4296(6) | $\frac{1}{4}$ | 0.7259(7)     | 0.022(2) |
| H(6A)  | 4c | 0.430(8)  | $\frac{1}{4}$ | 0.783(10)     | 0.026    |
| H(6B)  | 8d | 0.457(6)  | 0.276(3)      | 0.726(6)      | 0.026    |
| N(7)   | 4c | 0.2045(5) | $\frac{1}{4}$ | 0.7770(6)     | 0.020(2) |
| H(7A)  | 4c | 0.242(8)  | $\frac{1}{4}$ | 0.846(9)      | 0.024    |
| H(7B)  | 8d | 0.166(5)  | 0.276(3)      | 0.782(6)      | 0.024    |
| N(8)   | 8d | 0.2956(4) | 0.1613(2)     | 0.6266(5)     | 0.022(2) |
| H(8A)  | 8d | 0.244(6)  | 0.145(3)      | 0.659(6)      | 0.027    |
| H(8B)  | 8d | 0.342(6)  | 0.144(3)      | 0.656(6)      | 0.027    |
| H(8C)  | 8d | 0.292(6)  | 0.146(3)      | 0.573(7)      | 0.027    |
| N(9)   | 8d | 0.4811(4) | 0.1143(2)     | 0.9716(5)     | 0.024(2) |
| H(9A)  | 8d | 0.498(6)  | 0.115(4)      | 0.924(7)      | 0.029    |
| H(9B)  | 8d | 0.469(6)  | 0.150(3)      | 1.000(6)      | 0.029    |
| H(9C)  | 8d | 0.526(6)  | 0.107(3)      | 1.004(6)      | 0.029    |
| N(10)  | 8d | 0.2067(5) | 0.0174(2)     | 0.5662(5)     | 0.028(2) |
| H(10A) | 8d | 0.262(7)  | 0.007(3)      | 0.580(7)      | 0.034    |
| H(10B) | 8d | 0.176(6)  | 0.038(3)      | 0.613(7)      | 0.034    |
| H(10C) | 8d | 0.207(6)  | 0.051(3)      | 0.510(7)      | 0.034    |
| N(11)  | 8d | 0.2617(4) | 0.1081(2)     | 0.0425(5)     | 0.022(2) |
| H(11A) | 8d | 0.213(6)  | 0.103(3)      | −0.010(6)     | 0.026    |
| H(11B) | 8d | 0.274(6)  | 0.141(3)      | 0.033(6)      | 0.026    |
| H(11C) | 8d | 0.241(6)  | 0.100(3)      | 0.088(7)      | 0.026    |
| N(12)  | 8d | 0.3415(4) | 0.0397(2)     | 0.8565(5)     | 0.022(2) |
| H(12A) | 8d | 0.394(5)  | 0.049(3)      | 0.807(6)      | 0.026    |
| H(12B) | 8d | 0.297(6)  | 0.056(3)      | 0.843(6)      | 0.026    |
| H(12C) | 8d | 0.338(6)  | 0.011(3)      | 0.835(6)      | 0.026    |
| N(13)  | 8d | 0.4348(4) | 0.0587(2)     | 0.1778(5)     | 0.023(2) |
| H(13A) | 8d | 0.433(6)  | 0.033(3)      | 0.213(6)      | 0.027    |
| H(13B) | 8d | 0.401(6)  | 0.081(3)      | 0.220(6)      | 0.027    |
| H(13C) | 8d | 0.495(6)  | 0.067(3)      | 0.173(6)      | 0.027    |
| N(14)  | 8d | 0.4090(5) | −0.0180(3)    | 0.5949(7)     | 0.050(2) |
| F(1)   | 4c | 0.3872(3) | 0.2500        | 0.5105(4)     | 0.021(2) |
| F(2)   | 4b | 0         | 0             | $\frac{1}{2}$ | 0.021(2) |
| F(3)   | 8d | 0.050(1)  | 0.0761(3)     | 0.9044(6)     | 0.146(5) |
| F(4)   | 8d | 0.4571(3) | 0.1130(3)     | 0.7306(5)     | 0.069(2) |
| F(5)   | 8d | 0.1839(5) | 0.1139(4)     | 0.8362(6)     | 0.107(3) |
| F(6)   | 8d | 0.0855(6) | 0.0596(2)     | 0.7296(6)     | 0.096(3) |
| F(7)   | 8d | 0.0933(5) | 0.1517(3)     | 0.7085(5)     | 0.076(2) |
| F(8)   | 8d | 0.0528(4) | 0.1657(2)     | 0.8761(5)     | 0.060(2) |
| F(9)   | 8d | 0.4247(5) | 0.2037(2)     | 0.0910(4)     | 0.056(2) |
| F(10)  | 4c | 0.2812(5) | $\frac{1}{4}$ | 0.0903(6)     | 0.108(5) |

|       |    |           |           |           |           |
|-------|----|-----------|-----------|-----------|-----------|
| F(11) | 8d | 0.3267(5) | 0.2042(2) | 0.9423(4) | 0.059(2)  |
| F(12) | 4c | 0.4705(5) | ¼         | 0.9419(6) | 0.087(4)  |
| F(13) | 8d | 0.2422(3) | 0.0559(2) | 0.2703(4) | 0.032(1)  |
| F(14) | 8d | 0.2945(3) | 0.0999(2) | 0.4207(4) | 0.040(2)  |
| F(15) | 8d | 0.1410(3) | 0.1293(2) | 0.2347(4) | 0.038(2)  |
| F(16) | 8d | 0.1302(3) | 0.0843(2) | 0.3933(3) | 0.0272(9) |
| F(17) | 8d | 0.1949(4) | 0.1720(2) | 0.3818(4) | 0.043(2)  |
| F(18) | 8d | 0.3076(3) | 0.1413(2) | 0.2597(3) | 0.0239(8) |

Table S4. Anisotropic displacement parameters  $U_{ij}$  in  $10^4 \text{ pm}^2$  of  $[\text{In}_2\text{F}(\text{NH}_3)_{10}]_2[\text{SiF}_6]_5 \cdot 2 \text{ NH}_3$ .

| Atom  | $U_{11}$  | $U_{22}$  | $U_{33}$  | $U_{23}$   | $U_{13}$   | $U_{12}$   |
|-------|-----------|-----------|-----------|------------|------------|------------|
| In(1) | 0.0091(3) | 0.0163(3) | 0.0188(3) | 0          | 0.0004(2)  | 0          |
| In(2) | 0.0103(3) | 0.0153(3) | 0.0190(3) | 0          | 0.0010(2)  | 0          |
| In(3) | 0.0143(2) | 0.0134(2) | 0.0224(2) | 0.0007(2)  | 0.0020(2)  | 0.0019(2)  |
| Si(1) | 0.027(1)  | 0.0206(9) | 0.025(1)  | −0.0038(7) | −0.0011(8) | 0.0083(8)  |
| Si(2) | 0.014(1)  | 0.017(2)  | 0.022(2)  | 0          | −0.0018(9) | 0          |
| Si(3) | 0.0140(8) | 0.0173(8) | 0.0216(9) | −0.0003(7) | 0.0008(6)  | −0.0002(7) |
| N(1)  | 0.015(4)  | 0.019(4)  | 0.020(4)  | 0          | −0.001(3)  | 0          |
| N(2)  | 0.017(4)  | 0.031(5)  | 0.019(4)  | 0          | 0.000(3)   | 0          |
| N(3)  | 0.016(4)  | 0.025(4)  | 0.028(5)  | 0          | −0.003(3)  | 0          |
| N(4)  | 0.014(3)  | 0.018(3)  | 0.027(3)  | −0.001(2)  | 0.003(2)   | 0.000(2)   |
| N(5)  | 0.022(4)  | 0.026(4)  | 0.019(4)  | 0          | −0.007(3)  | 0          |
| N(6)  | 0.021(4)  | 0.028(4)  | 0.015(4)  | 0          | −0.004(3)  | 0          |
| N(7)  | 0.012(4)  | 0.023(4)  | 0.026(4)  | 0          | 0.003(3)   | 0          |
| N(8)  | 0.016(3)  | 0.015(3)  | 0.035(3)  | 0.000(2)   | 0.002(3)   | 0.002(2)   |
| N(9)  | 0.020(3)  | 0.019(3)  | 0.033(4)  | 0.002(3)   | 0.000(3)   | −0.001(2)  |
| N(10) | 0.030(3)  | 0.018(3)  | 0.036(4)  | −0.001(3)  | −0.007(3)  | −0.005(3)  |
| N(11) | 0.022(3)  | 0.019(3)  | 0.025(3)  | 0.001(2)   | 0.007(2)   | 0.003(2)   |
| N(12) | 0.020(3)  | 0.018(3)  | 0.027(3)  | −0.001(2)  | 0.001(2)   | 0.000(2)   |
| N(13) | 0.016(3)  | 0.024(3)  | 0.028(3)  | 0.003(2)   | 0.001(2)   | 0.004(2)   |
| N(14) | 0.038(4)  | 0.052(5)  | 0.061(5)  | 0.003(4)   | −0.006(4)  | −0.006(4)  |
| F(1)  | 0.012(2)  | 0.026(3)  | 0.024(3)  | 0          | 0.002(2)   | 0          |
| F(2)  | 0.016(2)  | 0.018(3)  | 0.028(3)  | 0.001(2)   | −0.004(2)  | 0.005(2)   |
| F(3)  | 0.31(2)   | 0.085(6)  | 0.044(4)  | 0.030(4)   | −0.021(6)  | −0.091(8)  |
| F(4)  | 0.022(2)  | 0.112(5)  | 0.075(4)  | 0.056(4)   | 0.000(3)   | −0.006(3)  |
| F(5)  | 0.060(4)  | 0.172(8)  | 0.088(5)  | −0.062(5)  | −0.048(4)  | 0.076(5)   |
| F(6)  | 0.154(7)  | 0.059(4)  | 0.074(5)  | −0.037(4)  | −0.031(5)  | 0.054(5)   |
| F(7)  | 0.075(4)  | 0.106(5)  | 0.045(4)  | 0.016(4)   | −0.010(3)  | −0.055(4)  |
| F(8)  | 0.071(4)  | 0.038(3)  | 0.070(4)  | −0.029(3)  | −0.025(3)  | 0.012(3)   |
| F(9)  | 0.105(5)  | 0.026(2)  | 0.038(3)  | −0.008(2)  | −0.036(3)  | 0.020(3)   |
| F(10) | 0.018(4)  | 0.29(2)   | 0.019(4)  | 0          | −0.004(3)  | 0          |

|       |          |          |          |           |           |           |
|-------|----------|----------|----------|-----------|-----------|-----------|
| F(11) | 0.110(5) | 0.025(2) | 0.041(3) | 0.010(2)  | −0.045(3) | −0.029(3) |
| F(12) | 0.014(3) | 0.22(2)  | 0.026(4) | 0         | 0.003(3)  | 0         |
| F(13) | 0.029(2) | 0.016(2) | 0.050(3) | −0.006(2) | 0.015(2)  | −0.003(2) |
| F(14) | 0.025(2) | 0.062(3) | 0.033(3) | 0.016(2)  | −0.010(2) | −0.011(2) |
| F(15) | 0.024(2) | 0.051(3) | 0.040(3) | 0.017(2)  | −0.003(2) | 0.009(2)  |
| F(16) | 0.016(2) | 0.033(2) | 0.033(2) | 0.003(2)  | 0.007(2)  | −0.002(2) |
| F(17) | 0.052(3) | 0.025(2) | 0.051(3) | −0.010(2) | 0.026(2)  | −0.001(2) |
| F(18) | 0.020(2) | 0.018(2) | 0.034(2) | 0.000(2)  | 0.004(2)  | −0.005(2) |

Table S5. Selected interatomic distances in pm and angles in degree of the hydrogen bonds in  $[\text{In}_2\text{F}(\text{NH}_3)_{10}]_2[\text{SiF}_6]_5 \cdot 2 \text{NH}_3$ .

|            | D–H     | A     | H...A   | D...A     | $\angle(\text{DHA})$ |
|------------|---------|-------|---------|-----------|----------------------|
| N(1)–H(1a) | 73(7)   | F(18) | 219(7)  | 284.5(4)  | 149(8)               |
| N(1)–H(1a) | 73(7)   | F(17) | 248(8)  | 312.6(8)  | 148(8)               |
| N(1)–H(1b) | 79(12)  | F(9)  | 254(11) | 315.0(10) | 136(8)               |
| N(1)–H(1b) | 79(12)  | F(9)  | 254(11) | 315.0(10) | 136(8)               |
| N(1)–H(1b) | 79(12)  | F(10) | 213(12) | 288.0(11) | 161(11)              |
| N(2)–H(2a) | 94(8)   | F(8)  | 193(8)  | 285.0(8)  | 165(7)               |
| N(2)–H(2b) | 74(12)  | F(10) | 203(12) | 276.3(11) | 170(13)              |
| N(3)–H(3a) | 102(12) | F(9)  | 221(10) | 309.0(9)  | 144(4)               |
| N(3)–H(3a) | 102(12) | F(9)  | 221(10) | 309.0(9)  | 144(4)               |
| N(3)–H(3b) | 90(7)   | F(15) | 243(7)  | 322.6(5)  | 148(7)               |
| N(3)–H(3b) | 90(7)   | F(17) | 232(8)  | 311.1(8)  | 146(7)               |
| N(4)–H(4a) | 79(8)   | F(15) | 216(9)  | 294.5(7)  | 170(8)               |
| N(4)–H(4b) | 82(9)   | F(8)  | 251(8)  | 318.2(9)  | 141(7)               |
| N(4)–H(4c) | 92(8)   | F(18) | 231(8)  | 307.6(7)  | 140(6)               |
| N(4)–H(4c) | 92(8)   | F(14) | 221(8)  | 306.6(7)  | 154(7)               |
| N(5)–H(5a) | 97(12)  | F(12) | 207(8)  | 282.5(11) | 157(10)              |
| N(5)–H(5b) | 82(8)   | F(17) | 198(8)  | 285.4(8)  | 160(8)               |
| N(6)–H(6a) | 76(13)  | F(12) | 218(13) | 291.4(11) | 165(12)              |
| N(6)–H(6b) | 76(7)   | F(8)  | 241(8)  | 306.1(9)  | 143(8)               |
| N(7)–H(7a) | 106(11) | F(11) | 209(10) | 301.3(9)  | 144(3)               |
| N(7)–H(7a) | 106(11) | F(11) | 209(10) | 301.3(9)  | 144(3)               |
| N(7)–H(7b) | 86(7)   | F(8)  | 250(7)  | 328.9(9)  | 154(7)               |
| N(7)–H(7b) | 86(7)   | F(7)  | 231(7)  | 307.2(8)  | 149(7)               |
| N(8)–H(8a) | 93(9)   | F(7)  | 223(9)  | 305.5(9)  | 147(7)               |
| N(8)–H(8b) | 87(9)   | F(4)  | 206(9)  | 292.4(8)  | 173(8)               |
| N(8)–H(8c) | 81(9)   | F(14) | 232(9)  | 313.4(8)  | 175(8)               |
| N(9)–H(9a) | 68(9)   | F(7)  | 239(9)  | 300.9(9)  | 153(10)              |
| N(9)–H(9a) | 68(9)   | F(4)  | 262(9)  | 320.5(10) | 146(9)               |
| N(9)–H(9b) | 100(9)  | F(9)  | 190(9)  | 286.8(8)  | 160(7)               |
| N(9)–H(9b) | 100(9)  | F(11) | 254(8)  | 316.7(9)  | 121(6)               |

|              |        |       |        |           |        |
|--------------|--------|-------|--------|-----------|--------|
| N(9)–H(9c)   | 78(9)  | F(16) | 209(9) | 285.9(8)  | 171(9) |
| N(10)–H(10a) | 84(9)  | N(14) | 217(9) | 300.8(10) | 173(8) |
| N(10)–H(10b) | 91(9)  | F(6)  | 207(9) | 295.3(10) | 161(8) |
| N(10)–H(10c) | 112(9) | F(16) | 207(9) | 304.0(8)  | 143(6) |
| N(10)–H(10c) | 112(9) | F(14) | 212(9) | 309.5(8)  | 144(7) |
| N(11)–H(11a) | 99(8)  | F(5)  | 209(8) | 294.4(9)  | 144(6) |
| N(11)–H(11b) | 86(8)  | F(11) | 213(9) | 291.4(8)  | 152(7) |
| N(11)–H(11c) | 70(8)  | F(15) | 251(9) | 310.4(8)  | 144(9) |
| N(12)–H(12a) | 102(8) | F(4)  | 210(8) | 297.4(8)  | 143(6) |
| N(12)–H(12b) | 78(8)  | F(5)  | 215(9) | 291.6(9)  | 166(8) |
| N(12)–H(12c) | 79(8)  | F(16) | 256(9) | 319.7(8)  | 139(7) |
| N(12)–H(12c) | 79(8)  | F(13) | 220(9) | 292.0(7)  | 152(8) |
| N(13)–H(13a) | 80(8)  | F(6)  | 237(8) | 308.0(9)  | 150(8) |
| N(13)–H(13b) | 92(8)  | F(18) | 208(8) | 295.6(7)  | 157(7) |
| N(13)–H(13b) | 92(8)  | F(13) | 242(8) | 297.5(7)  | 119(6) |
| N(13)–H(13c) | 87(8)  | F(16) | 215(9) | 297.7(7)  | 160(8) |

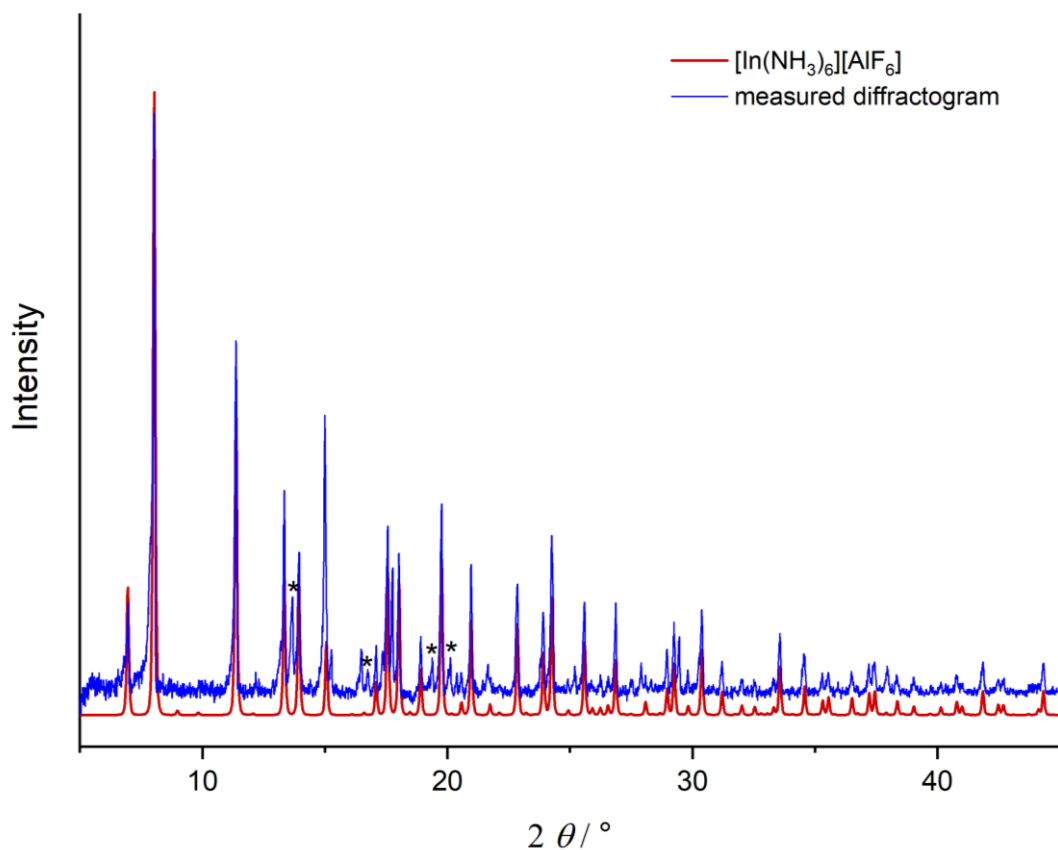

Figure S1. Powder X-ray diffraction pattern of  $[\text{In}(\text{NH}_3)_6][\text{AlF}_6]$ . Blue: measured diffractogram, red: simulated powder pattern according to results from structure determination. KF [1] and In [2] were identified as side phases. Unassigned reflections are marked with an asterisk.

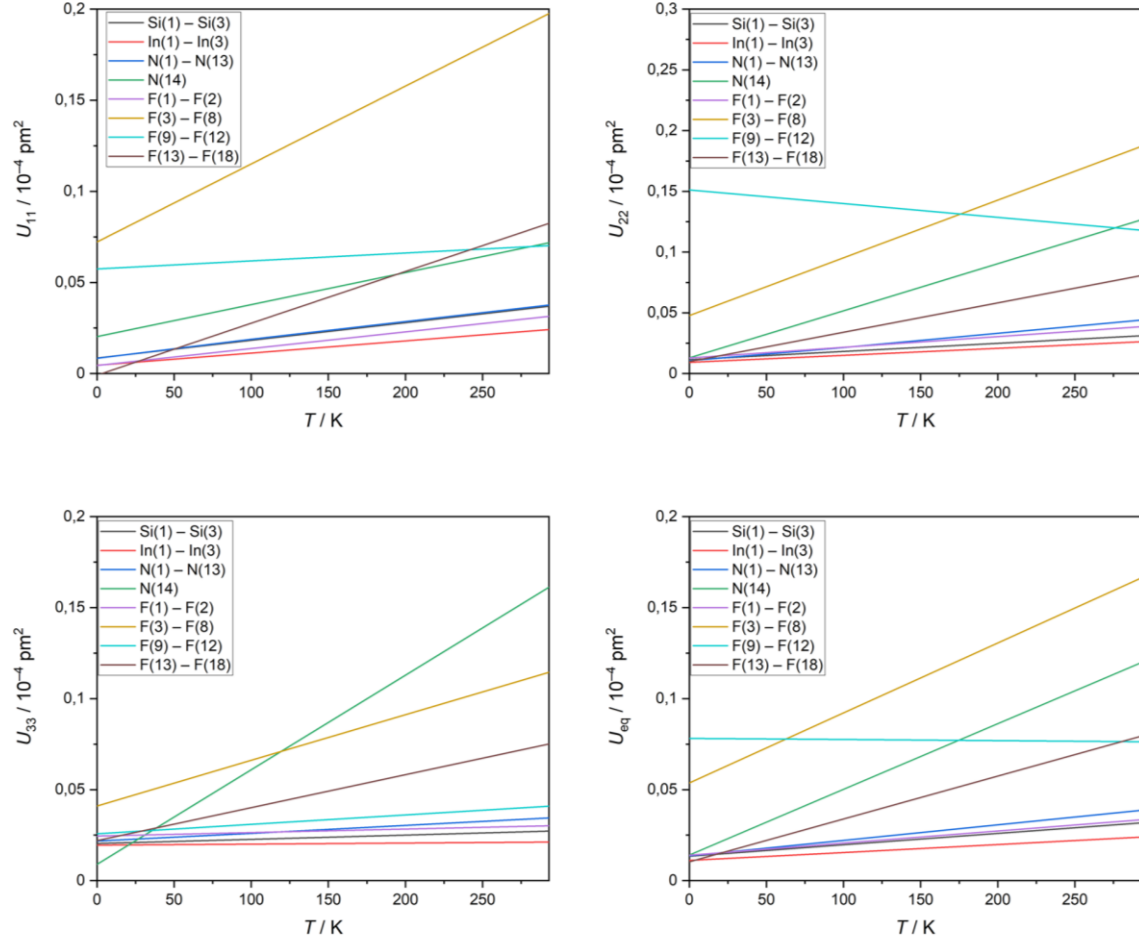

Figure S2. Extrapolation of  $U_{11}$ ,  $U_{22}$ ,  $U_{33}$  and  $U_{eq}$  to 0 K, according to refinements of single crystal X-ray diffraction data obtained at 293 and 100 K, for specific atom groups of  $[\text{In}_2\text{F}(\text{NH}_3)_{10}]_2[\text{SiF}_6]_5 \cdot 2 \text{NH}_3$ .

Table S6. Extrapolation of  $U_{11}$ ,  $U_{22}$ ,  $U_{33}$  and  $U_{eq}$  to 0 K (in  $10^{-4} \text{ pm}^2$ ), according to refinements of single crystal X-ray diffraction data obtained at 293 and 100 K, for specific atom groups of  $[\text{In}_2\text{F}(\text{NH}_3)_{10}]_2[\text{SiF}_6]_5 \cdot 2 \text{NH}_3$ .

| Atom group | $U_{eq}$ | $U_{11}$ | $U_{22}$ | $U_{33}$ |
|------------|----------|----------|----------|----------|
| In(1–3)    | 0.0120   | 0.0118   | 0.0159   | 0.0204   |
| Si(1–3)    | 0.0143   | 0.0182   | 0.0192   | 0.0231   |
| N(1–13)    | 0.0146   | 0.0179   | 0.0240   | 0.0264   |
| N(14)      | 0.0149   | 0.0137   | 0.0229   | 0.0269   |
| F(1–2)     | 0.0149   | 0.0137   | 0.0229   | 0.0269   |
| F(3–8)     | 0.0543   | 0.1149   | 0.0962   | 0.0663   |
| F(9–12)    | 0.0794   | 0.0618   | 0.1416   | 0.0316   |
| F(13–18)   | 0.0112   | 0.0283   | 0.0349   | 0.0398   |

## References

1. Borch, E.; Oftedal, I.; Pabst, A. Neubestimmung der Gitterkonstanten von KF, CsCl und BaF<sub>2</sub>. *Z. Phys. Chem., Abt. B* **1929**, *3*, 209–214.
2. Wołczyrz, M.; Kubiak, R.; Maciejewski, S. X-ray investigation of thermal expansion and atomic thermal vibrations of tin, indium, and their alloys. *Phys. Status Solidi B* **1981**, *107*, 245–253, doi:10.1002/pssb.2221070125.
